# Supplementary material for: Efficacy of the Reactive Oxygen Species Generated by Immobilized TiO2in the Photocatalytic Degradation of Diclofenac
Source: Hindawi journal article supplement (doi:10.1155/2015/919217), 2015-01-01
Supplement: f1 [file 919217.f1.pdf]

# Supporting Information

## Efficacy of the Reactive Oxygen Species Generated by Immobilized $\text{TiO}_2$ in the Photocatalytic Degradation of Diclofenac

B. Di Credico <sup>a\*</sup>, I.R. Bellobono <sup>b</sup>, M. D'Arienzo <sup>a</sup>, D. Fumagalli <sup>a</sup>, M. Redaelli <sup>a</sup>, R. Scotti <sup>a</sup> and F. Morazzoni <sup>a</sup>

*Department of Material Science, INSTM, HINT - COST Project, University of Milano-Bicocca, Via R. Cozzi 55, 20125 Milano, Italy; \*E-mail: barbara.dicredico@unimib.it*

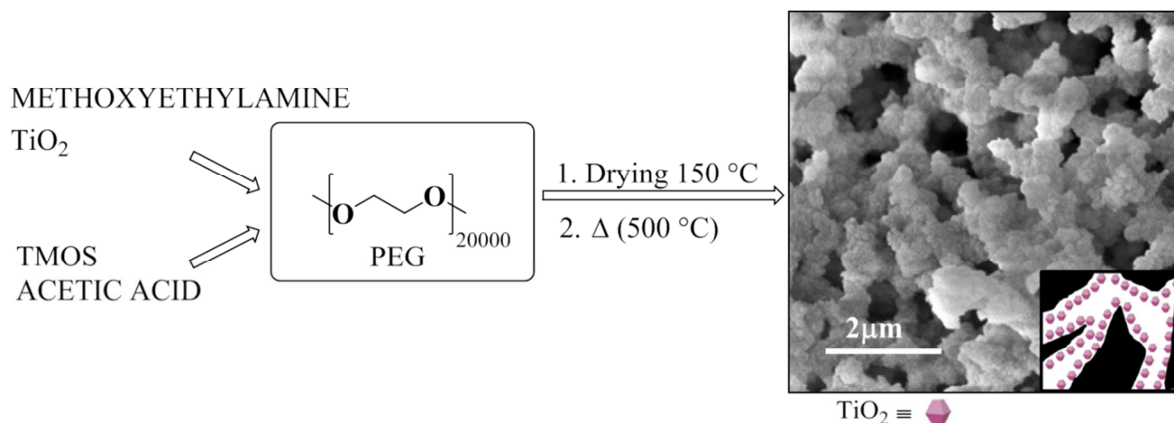

**FIGURE S1:** Schematic representation of overall synthetic process of TS composite material and related SEM image. Schematic picture of obtained TS catalyst is shown in the inset of the SEM image.

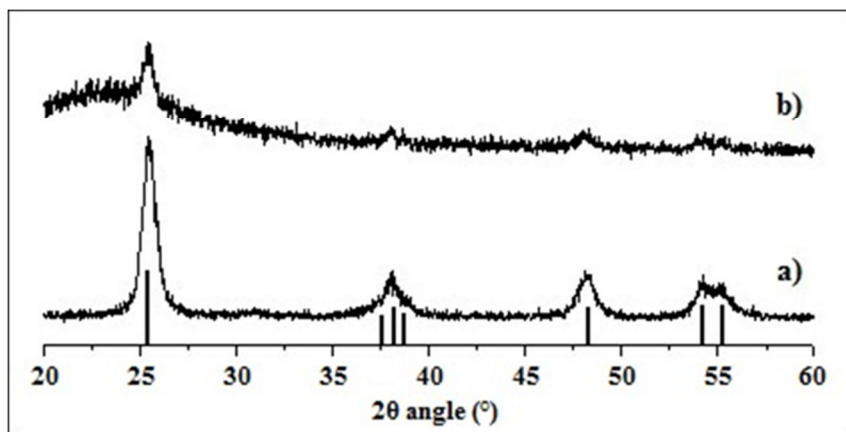

**FIGURE S2:** X-ray diffraction patterns of both (a) anatase TiO<sub>2</sub> and (b) TS powders.

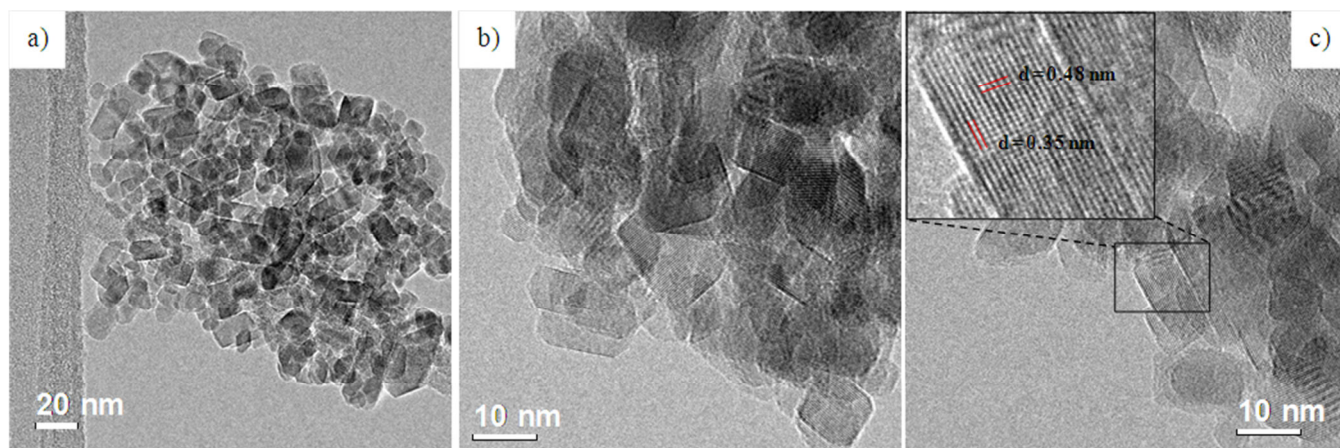

**FIGURE S3:** TEM (a, b) and HRTEM (c) images of TiO<sub>2</sub> anatase nanocrystals. Inset in c) highlight the crystallographic planes.

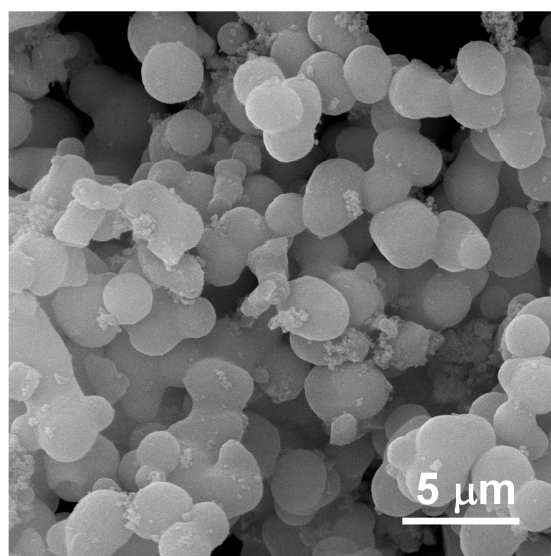

**FIGURE S4:** SEM micrograph of TS composite.

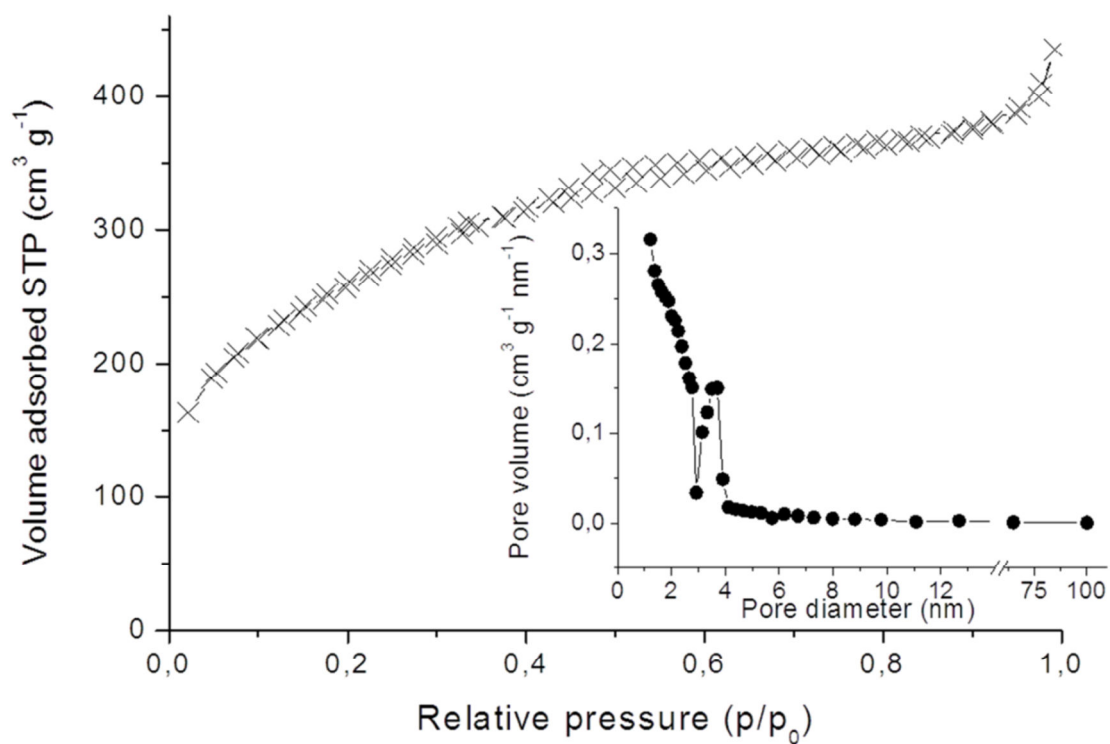

**FIGURE S5:** Nitrogen physisorption isotherm of TS sample. The pore size distribution is showed in the inset.

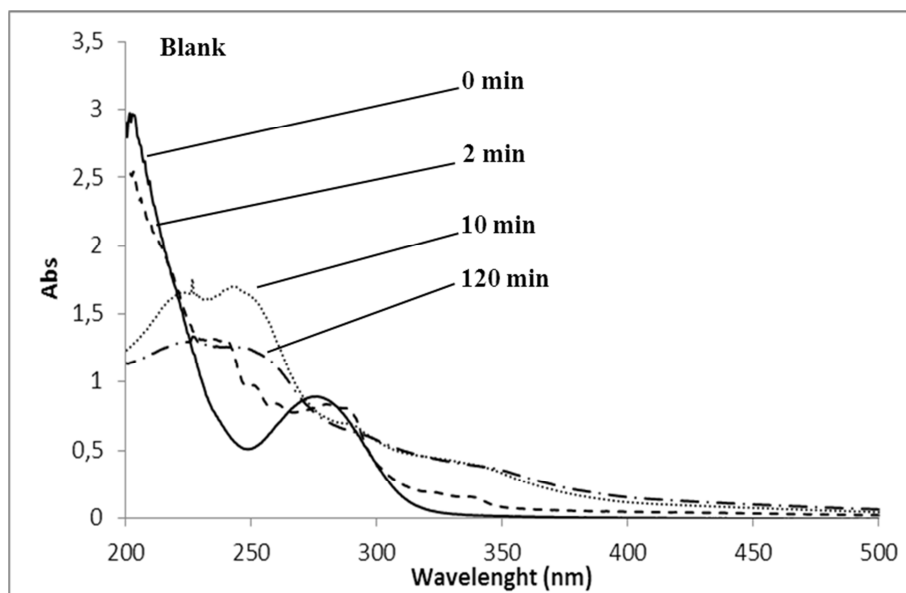

**FIGURE S6:** Selected absorption spectra of DCF recorded at different reaction times without catalyst (Blank). [DCF (solid line), with photoreaction spectra after 2 min.(dashed line), 10 min. (dotted line), 120 min. (dotted-dashed line)].
